# Supplementary material for: The last link of the x-aminobutyric acid series: the five conformers of β-aminobutyric acid
Source: Royal Society of Chemistry journal article supplement (doi:10.1039/c8cp01734d), 2018-01-01

**Supporting information for:**

## The last link of the $\alpha$ -aminobutyric acid series: the five conformers of $\beta$ -aminobutyric acid

I. León,<sup>a</sup> I. Peña,<sup>a</sup> C. Cabezas,<sup>a</sup> E. R. Alonso<sup>a</sup> and J. L. Alonso\*<sup>a</sup>

<sup>a</sup>Grupo de Espectroscopía Molecular (GEM), Edificio Quifima, Laboratorios de Espectroscopia y Bioespectroscopia, Unidad Asociada CSIC, Parque Científico UVa, Universidad de Valladolid, 47011 Valladolid, Spain.

\*Corresponding Author:

Jose Luis Alonso, [jlalonso@qf.uva.es](mailto:jlalonso@qf.uva.es)

phones: +34 983 186344 / +34 983 186349

web: <http://www.gem.uva.es/>

**Fig. S01** N-H...O=C angle (in green) and hydrogen bond distance in Amstrongs (in black) for conformer 1I' of  $\beta$ -aminobutyric acid. The cartesian coordinates are also given.

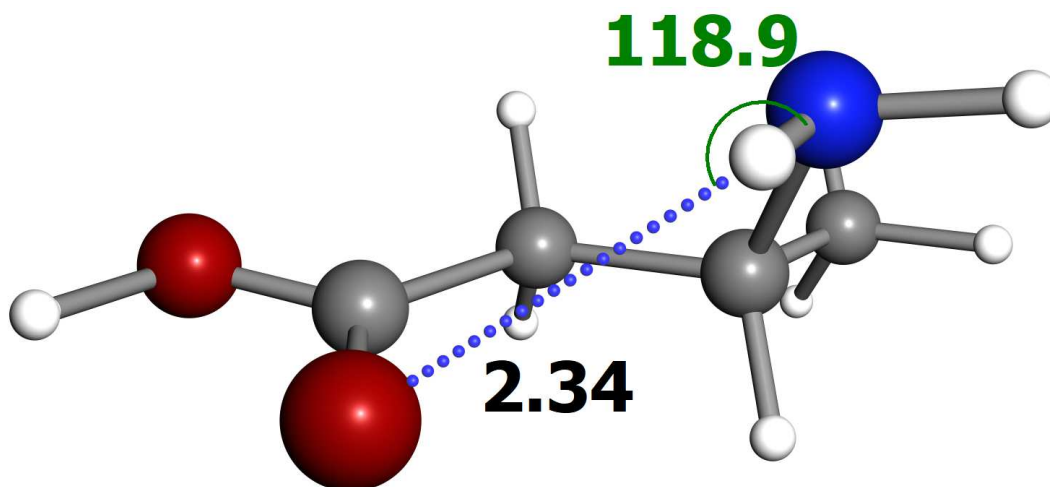

|   |                 |                 |                 |
|---|-----------------|-----------------|-----------------|
| C | 2.440196000000  | -0.779844000000 | 0.160153000000  |
| C | 1.175045000000  | 0.060665000000  | 0.288890000000  |
| N | 1.261608000000  | 1.197437000000  | -0.633420000000 |
| C | -0.048160000000 | -0.773273000000 | -0.077737000000 |
| C | -1.343753000000 | -0.020159000000 | 0.085801000000  |
| O | -2.400791000000 | -0.756895000000 | -0.336927000000 |
| O | -1.465758000000 | 1.096405000000  | 0.544085000000  |
| H | -3.184821000000 | -0.207546000000 | -0.189484000000 |
| H | 0.531158000000  | 1.868724000000  | -0.412340000000 |
| H | 2.150434000000  | 1.673822000000  | -0.507542000000 |
| H | 0.027490000000  | -1.105092000000 | -1.119359000000 |
| H | -0.109916000000 | -1.671481000000 | 0.548899000000  |
| H | 3.321996000000  | -0.193725000000 | 0.439591000000  |
| H | 2.396054000000  | -1.656681000000 | 0.813070000000  |
| H | 2.563399000000  | -1.112426000000 | -0.875345000000 |
| H | 1.065375000000  | 0.381934000000  | 1.336550000000  |

**Fig. S02** C=O...N-H angle (in green) and hydrogen bond distance in Amstrongs (in black) for conformer 2II of  $\beta$ -aminobutyric acid. The cartesian coordinates are also given.

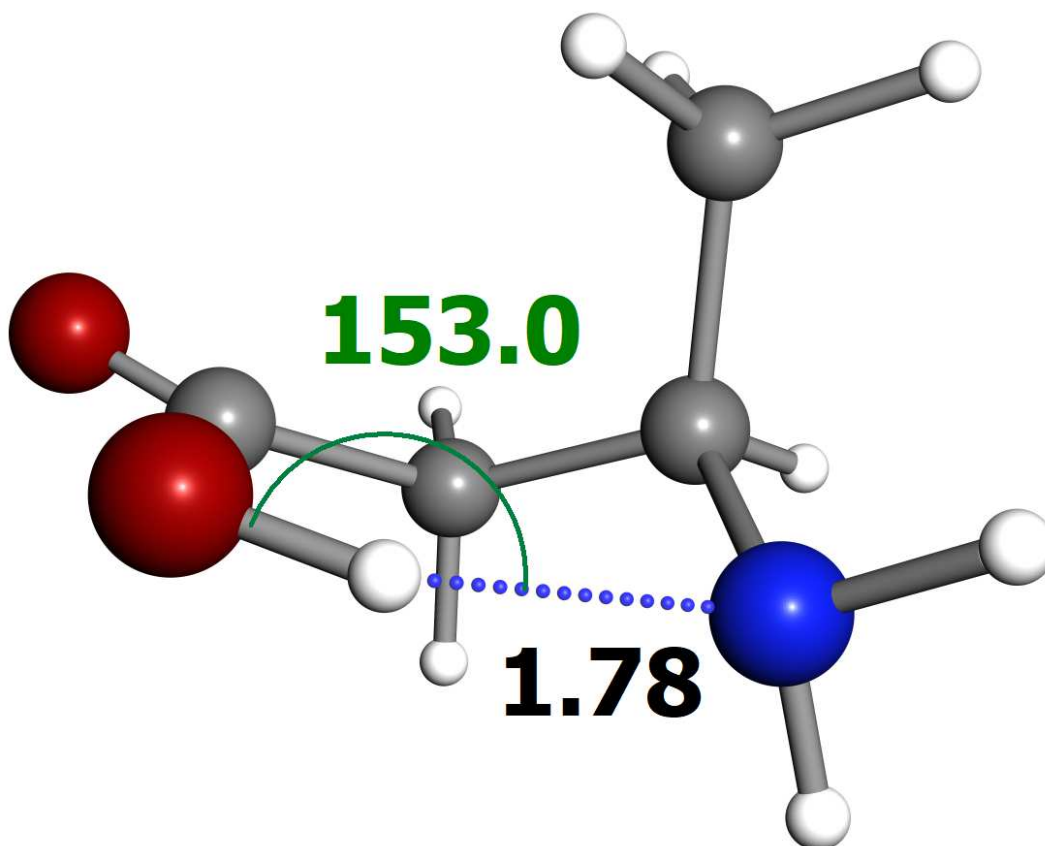

|   |                 |                 |                 |
|---|-----------------|-----------------|-----------------|
| C | 1.347120000000  | -1.146332000000 | -0.846225000000 |
| C | 1.230030000000  | -0.320543000000 | 0.430669000000  |
| N | 1.552055000000  | 1.091493000000  | 0.127711000000  |
| C | -0.186235000000 | -0.375233000000 | 1.018669000000  |
| C | -1.288484000000 | 0.047718000000  | 0.048347000000  |
| O | -1.031832000000 | 1.162218000000  | -0.661472000000 |
| O | -2.332577000000 | -0.553935000000 | -0.060179000000 |
| H | -0.092219000000 | 1.414523000000  | -0.484030000000 |
| H | 1.754900000000  | 1.603654000000  | 0.983480000000  |
| H | 2.382161000000  | 1.150132000000  | -0.456599000000 |
| H | -0.418216000000 | -1.388517000000 | 1.353799000000  |
| H | -0.242224000000 | 0.285507000000  | 1.894152000000  |
| H | 2.378729000000  | -1.146830000000 | -1.213775000000 |
| H | 1.053519000000  | -2.181995000000 | -0.654993000000 |
| H | 0.700109000000  | -0.742800000000 | -1.631047000000 |
| H | 1.919544000000  | -0.734046000000 | 1.179485000000  |

**Fig. S03** C=O...N-H angle (in green) and hydrogen bond distance in Amstrongs (in black) for conformer 3II of  $\beta$ -aminobutyric acid. The cartesian coordinates are also given.

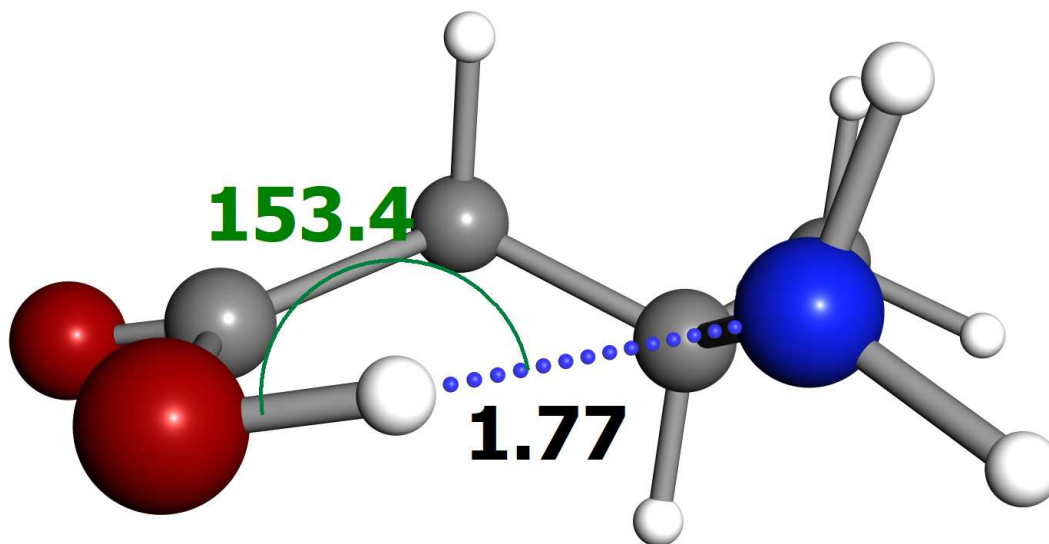

|   |              |              |              |
|---|--------------|--------------|--------------|
| C | -2.394340000 | -0.839898000 | -0.093471000 |
| C | -1.097671000 | -0.066316000 | -0.320185000 |
| N | -1.162311000 | 1.337751000  | 0.136750000  |
| C | 0.084650000  | -0.741652000 | 0.383506000  |
| C | 1.456275000  | -0.170746000 | 0.025180000  |
| O | 1.515228000  | 1.167716000  | -0.085455000 |
| O | 2.430054000  | -0.872062000 | -0.130349000 |
| H | 0.596887000  | 1.515003000  | 0.035371000  |
| H | -1.794809000 | 1.877850000  | -0.448447000 |
| H | -1.536792000 | 1.374005000  | 1.083732000  |
| H | -0.047824000 | -0.644810000 | 1.470752000  |
| H | 0.111479000  | -1.808207000 | 0.150493000  |
| H | -3.234999000 | -0.339767000 | -0.584805000 |
| H | -2.318181000 | -1.856372000 | -0.491688000 |
| H | -2.611109000 | -0.907447000 | 0.978997000  |
| H | -0.884210000 | -0.028073000 | -1.395410000 |

**Fig. S04** N-H...O=C angle (in green) and hydrogen bond distance in Amstrongs (in black) for conformer 4I' of  $\beta$ -aminobutyric acid. The cartesian coordinates are also given.

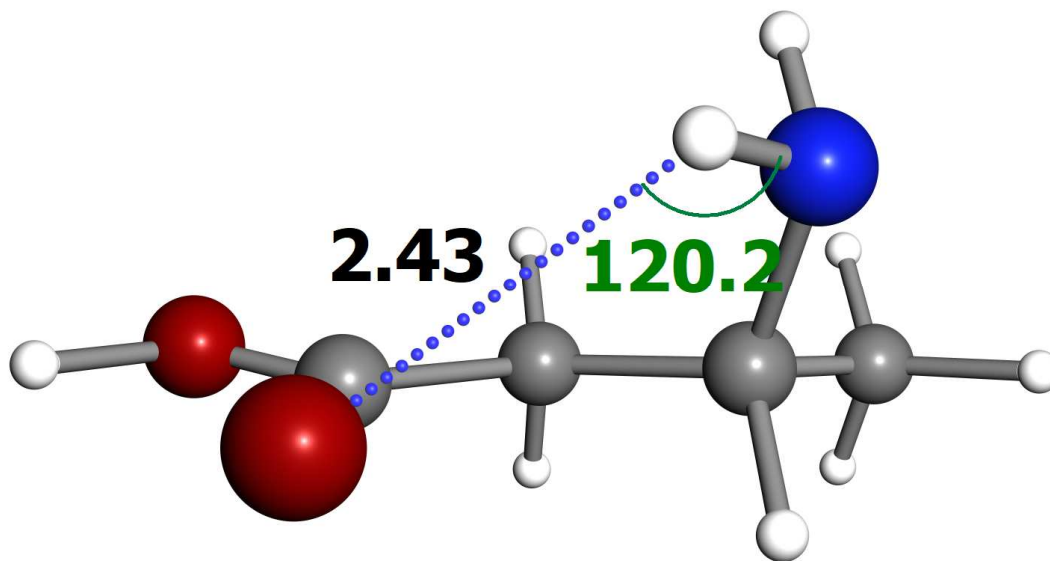

|   |              |              |              |
|---|--------------|--------------|--------------|
| C | -2.452017000 | -0.752400000 | -0.192906000 |
| C | -1.182668000 | 0.088663000  | -0.282469000 |
| N | -1.338440000 | 1.270929000  | 0.564079000  |
| C | 0.040852000  | -0.772590000 | 0.055578000  |
| C | 1.344601000  | -0.031627000 | -0.102559000 |
| O | 2.385416000  | -0.745999000 | 0.395462000  |
| O | 1.484042000  | 1.058029000  | -0.615791000 |
| H | 3.177975000  | -0.213888000 | 0.230287000  |
| H | -1.437425000 | 0.994931000  | 1.538052000  |
| H | -0.520352000 | 1.867819000  | 0.489076000  |
| H | -0.022978000 | -1.147300000 | 1.084738000  |
| H | 0.090479000  | -1.655494000 | -0.595355000 |
| H | -3.319642000 | -0.146583000 | -0.463557000 |
| H | -2.400041000 | -1.620059000 | -0.857667000 |
| H | -2.594878000 | -1.117126000 | 0.831536000  |
| H | -1.064337000 | 0.452685000  | -1.308891000 |

**Fig. S05** N-H•••O=C angle (in green) and hydrogen bond distance in Amstrongs (in black) for conformer 5I' of  $\beta$ -aminobutyric acid. The cartesian coordinates are also given.

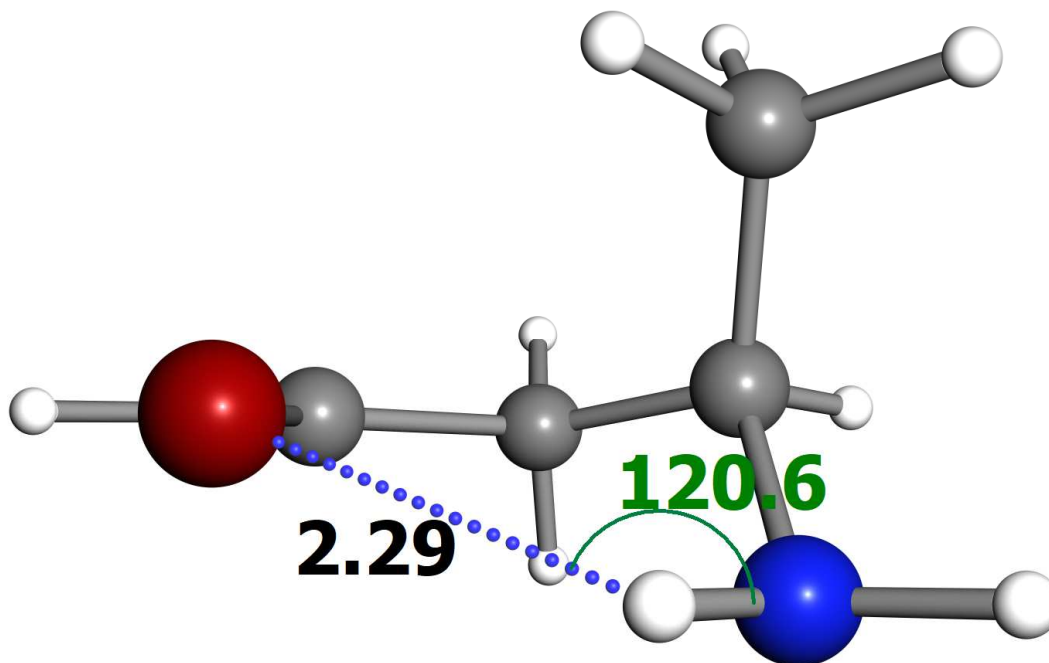

|   |              |              |              |
|---|--------------|--------------|--------------|
| C | -1.617318000 | -0.833944000 | 0.997804000  |
| C | -1.289228000 | -0.320321000 | -0.409853000 |
| N | -1.574527000 | 1.100312000  | -0.631643000 |
| C | 0.161649000  | -0.608519000 | -0.801475000 |
| C | 1.187835000  | 0.101478000  | 0.046988000  |
| O | 2.431732000  | -0.391191000 | -0.181015000 |
| O | 0.981906000  | 1.007229000  | 0.827393000  |
| H | 3.030804000  | 0.139798000  | 0.364516000  |
| H | -2.568086000 | 1.275215000  | -0.511381000 |
| H | -1.083631000 | 1.652487000  | 0.066712000  |
| H | 0.372994000  | -1.682148000 | -0.760022000 |
| H | 0.329158000  | -0.285390000 | -1.835421000 |
| H | -2.680602000 | -0.686673000 | 1.212535000  |
| H | -1.399846000 | -1.904788000 | 1.085570000  |
| H | -1.038264000 | -0.294354000 | 1.752202000  |
| H | -1.907575000 | -0.876805000 | -1.125021000 |

**Fig. S06** N-H...O-H angle (in green) and hydrogen bond distance in Amstrongs (in black) for conformer 6 of  $\beta$ -aminobutyric acid. The cartesian coordinates are also given.

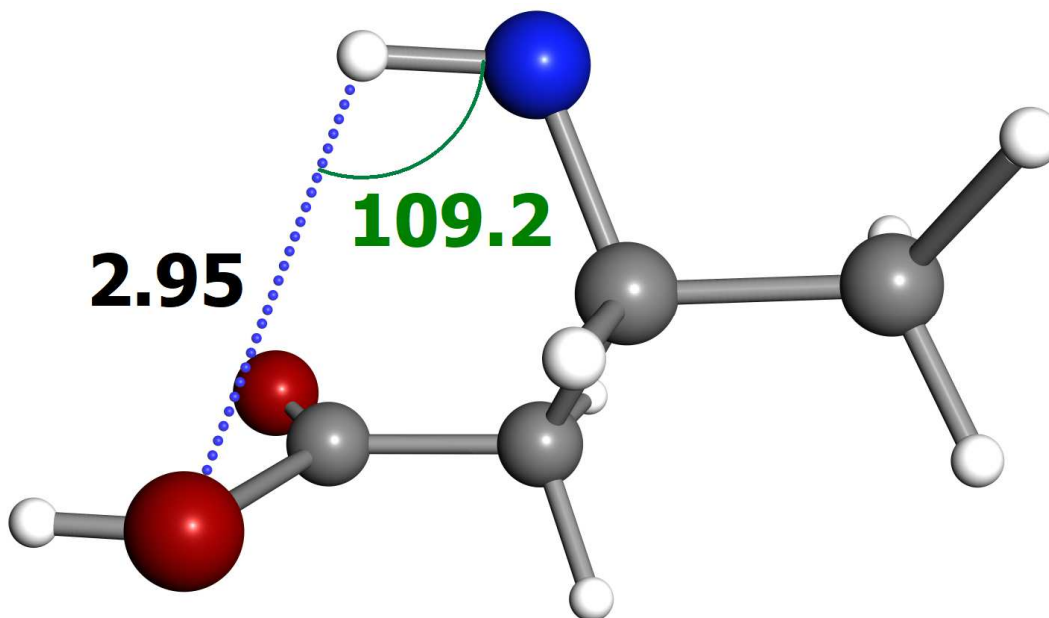

|   |                 |                 |                 |
|---|-----------------|-----------------|-----------------|
| C | 2.491879000000  | -0.530768000000 | -0.133578000000 |
| C | 1.121820000000  | -0.036035000000 | 0.318312000000  |
| N | 1.103284000000  | 1.424960000000  | 0.260728000000  |
| C | 0.018543000000  | -0.714709000000 | -0.523649000000 |
| C | -1.347848000000 | -0.184842000000 | -0.187341000000 |
| O | -1.651745000000 | -0.410398000000 | 1.120762000000  |
| O | -2.096756000000 | 0.399110000000  | -0.939254000000 |
| H | -2.537052000000 | -0.040787000000 | 1.255547000000  |
| H | 1.160444000000  | 1.741998000000  | -0.704381000000 |
| H | 0.242365000000  | 1.800448000000  | 0.648310000000  |
| H | 0.191789000000  | -0.530701000000 | -1.587938000000 |
| H | 0.031314000000  | -1.795820000000 | -0.342205000000 |
| H | 3.272395000000  | -0.091358000000 | 0.491564000000  |
| H | 2.554821000000  | -1.621545000000 | -0.073418000000 |
| H | 2.677005000000  | -0.235079000000 | -1.172996000000 |
| H | 0.965568000000  | -0.313441000000 | 1.365898000000  |

**Fig. S07** N-H•••O=C angle (in green) and hydrogen bond distance in Amstrongs (in black) for conformer 7I' of  $\beta$ -aminobutyric acid. The cartesian coordinates are also given.

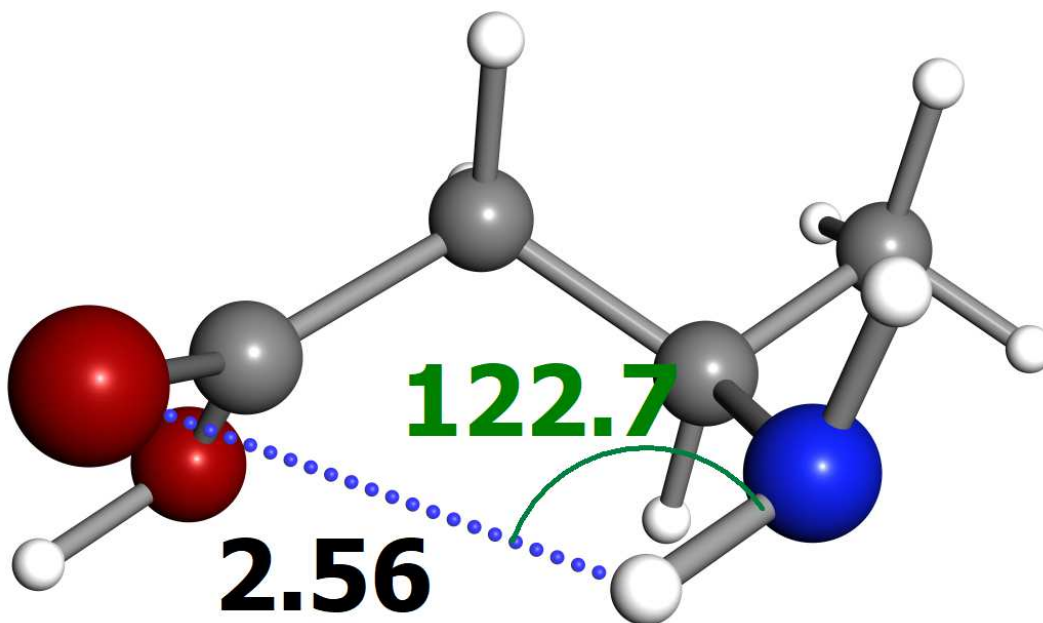

|   |                 |                 |                 |
|---|-----------------|-----------------|-----------------|
| C | -2.436284000000 | -0.687630000000 | 0.101485000000  |
| C | -1.096505000000 | -0.095358000000 | -0.321607000000 |
| N | -1.247927000000 | 1.349105000000  | -0.473304000000 |
| C | 0.005289000000  | -0.523225000000 | 0.683901000000  |
| C | 1.348704000000  | -0.054919000000 | 0.204894000000  |
| O | 1.955390000000  | -0.986856000000 | -0.576477000000 |
| O | 1.831482000000  | 1.038874000000  | 0.413147000000  |
| H | 2.775261000000  | -0.577115000000 | -0.890716000000 |
| H | -1.575391000000 | 1.749776000000  | 0.402834000000  |
| H | -0.355020000000 | 1.792843000000  | -0.671860000000 |
| H | -0.198606000000 | -0.058955000000 | 1.653209000000  |
| H | 0.009538000000  | -1.611927000000 | 0.786058000000  |
| H | -3.212959000000 | -0.393552000000 | -0.608431000000 |
| H | -2.387695000000 | -1.779207000000 | 0.147146000000  |
| H | -2.717102000000 | -0.315398000000 | 1.094071000000  |
| H | -0.824739000000 | -0.499547000000 | -1.304577000000 |



**Fig. S08** N-H...O-H angle (in green) and hydrogen bond distance in Amstrongs (in black) for conformer 8III of  $\beta$ -aminobutyric acid. The cartesian coordinates are also given.

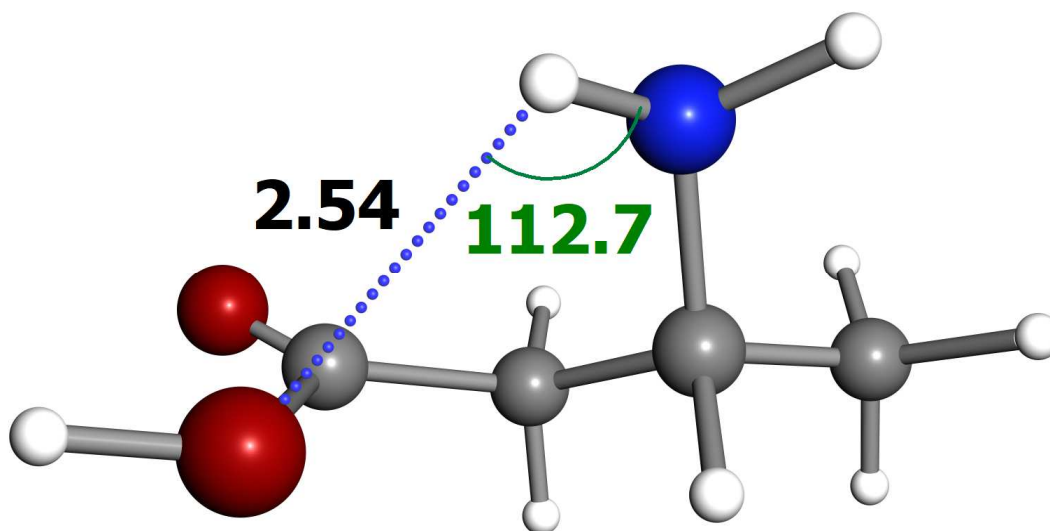

|   |                 |                 |                 |
|---|-----------------|-----------------|-----------------|
| C | 2.475288000000  | -0.591375000000 | 0.198270000000  |
| C | 1.137650000000  | 0.136551000000  | 0.264488000000  |
| N | 1.080066000000  | 1.123099000000  | -0.820728000000 |
| C | -0.007441000000 | -0.861672000000 | 0.081853000000  |
| C | -1.379684000000 | -0.240553000000 | 0.005043000000  |
| O | -1.496338000000 | 0.832980000000  | 0.840258000000  |
| O | -2.297954000000 | -0.632308000000 | -0.677130000000 |
| H | -2.411715000000 | 1.136726000000  | 0.747072000000  |
| H | 0.326312000000  | 1.783810000000  | -0.651432000000 |
| H | 1.939640000000  | 1.665181000000  | -0.838132000000 |
| H | 0.136245000000  | -1.436247000000 | -0.836788000000 |
| H | -0.022185000000 | -1.560566000000 | 0.928285000000  |
| H | 3.303378000000  | 0.105146000000  | 0.366907000000  |
| H | 2.530722000000  | -1.374637000000 | 0.959992000000  |
| H | 2.602814000000  | -1.046233000000 | -0.789084000000 |
| H | 1.033778000000  | 0.602045000000  | 1.255335000000  |

**Fig. S09** N-H•••O=C angle (in green) and hydrogen bond distance in Amstrongs (in black) for conformer 9I' of  $\beta$ -aminobutyric acid. The cartesian coordinates are also given.

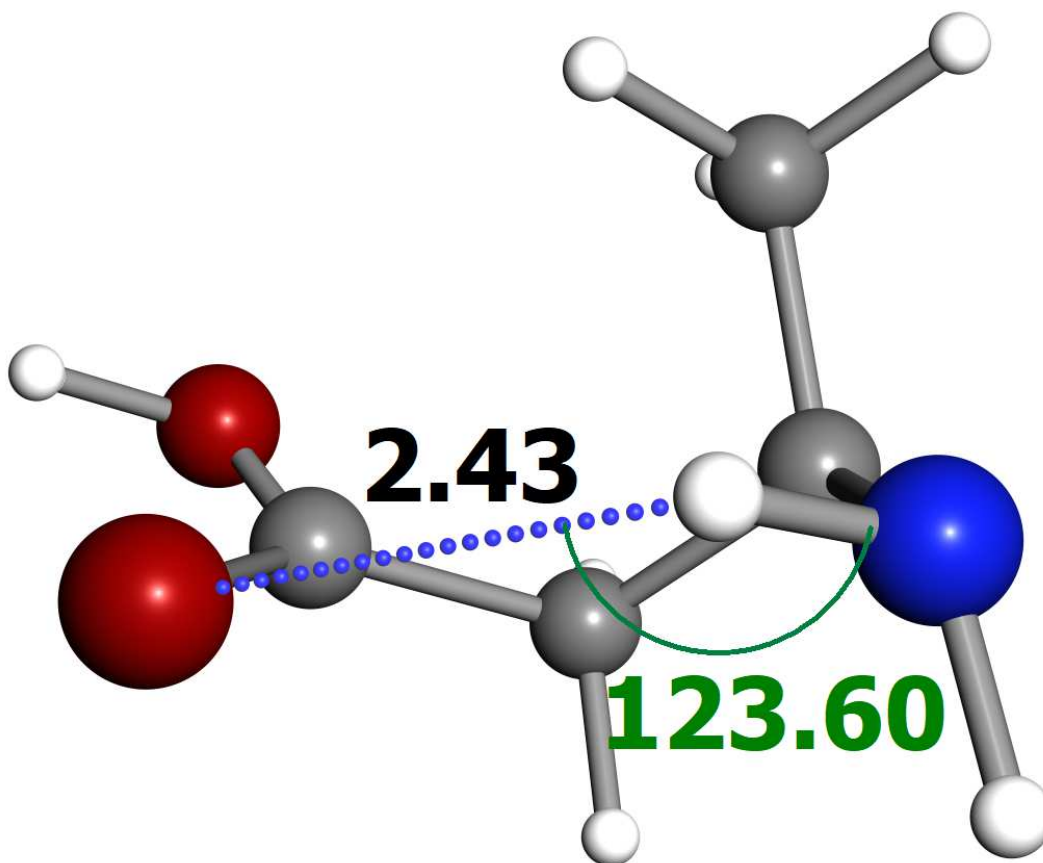

|   |              |              |              |
|---|--------------|--------------|--------------|
| C | -1.224249000 | 1.320604000  | -0.655303000 |
| C | -1.296184000 | 0.211429000  | 0.390596000  |
| N | -1.836177000 | -0.994980000 | -0.230362000 |
| C | 0.073042000  | 0.022592000  | 1.099730000  |
| C | 1.161993000  | -0.246884000 | 0.097073000  |
| O | 2.047367000  | 0.777904000  | 0.009223000  |
| O | 1.241774000  | -1.238268000 | -0.599672000 |
| H | 2.680878000  | 0.521283000  | -0.678236000 |
| H | -1.165071000 | -1.363814000 | -0.900326000 |
| H | -1.966059000 | -1.721748000 | 0.468462000  |
| H | 0.319967000  | 0.912558000  | 1.684204000  |
| H | 0.008703000  | -0.840569000 | 1.769489000  |
| H | -2.221362000 | 1.512015000  | -1.057889000 |
| H | -0.824465000 | 2.244235000  | -0.225971000 |
| H | -0.576968000 | 1.023593000  | -1.488504000 |
| H | -2.003124000 | 0.513779000  | 1.172317000  |

**Fig. S10** N-H•••O-H angle (in green) and hydrogen bond distance in Amstrongs (in black) for conformer 10III of  $\beta$ -aminobutyric acid. The cartesian coordinates are also given.

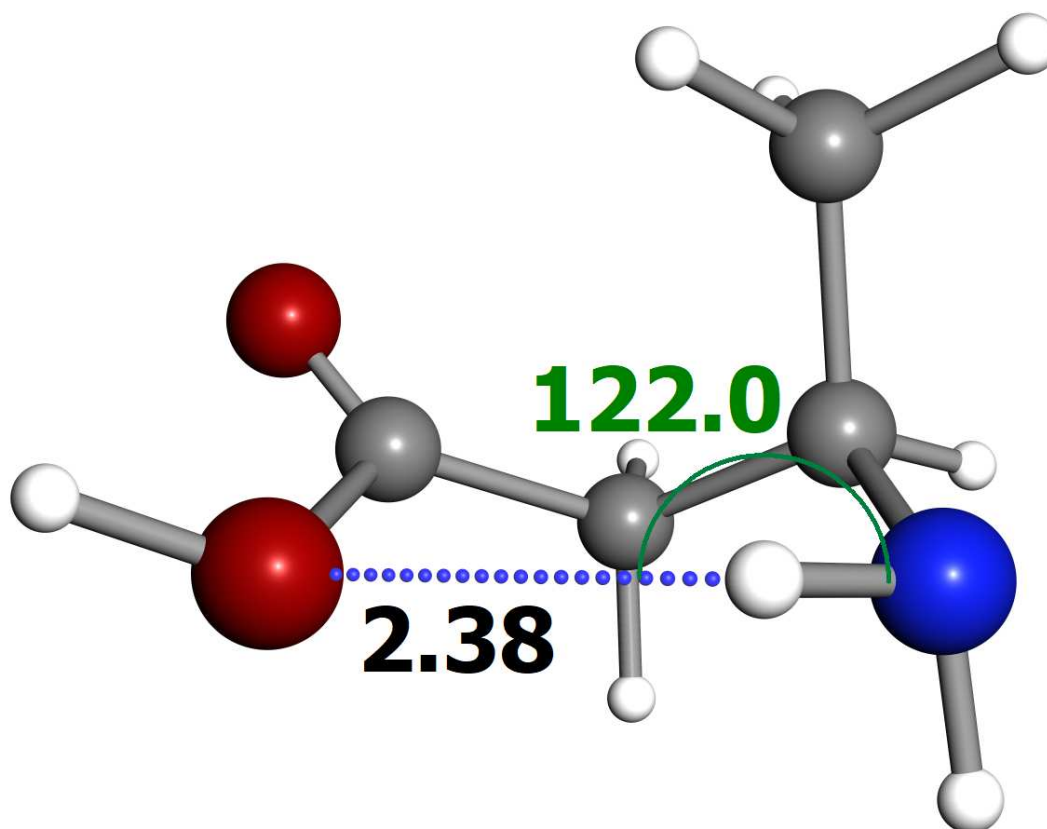

|   |                 |                 |                 |
|---|-----------------|-----------------|-----------------|
| C | 1.258905000000  | -1.254814000000 | -0.729322000000 |
| C | 1.291515000000  | -0.207235000000 | 0.379766000000  |
| N | 1.794452000000  | 1.051733000000  | -0.165332000000 |
| C | -0.079645000000 | -0.120450000000 | 1.104988000000  |
| C | -1.236393000000 | 0.010833000000  | 0.150931000000  |
| O | -1.228131000000 | 1.214463000000  | -0.493277000000 |
| O | -2.076330000000 | -0.832569000000 | -0.070871000000 |
| H | -1.992106000000 | 1.195547000000  | -1.089694000000 |
| H | 1.120376000000  | 1.435254000000  | -0.822268000000 |
| H | 1.898315000000  | 1.740666000000  | 0.574687000000  |
| H | -0.248767000000 | -1.031173000000 | 1.685126000000  |
| H | -0.071953000000 | 0.739168000000  | 1.783499000000  |
| H | 2.261771000000  | -1.387489000000 | -1.140936000000 |
| H | 0.890465000000  | -2.215038000000 | -0.355916000000 |
| H | 0.598976000000  | -0.934606000000 | -1.543833000000 |
| H | 2.011154000000  | -0.529618000000 | 1.141668000000  |

**Fig. S11** N-H•••O-H angle (in green) and hydrogen bond distance in Amstrongs (in black) for conformer 11III of  $\beta$ -aminobutyric acid. The cartesian coordinates are also given.

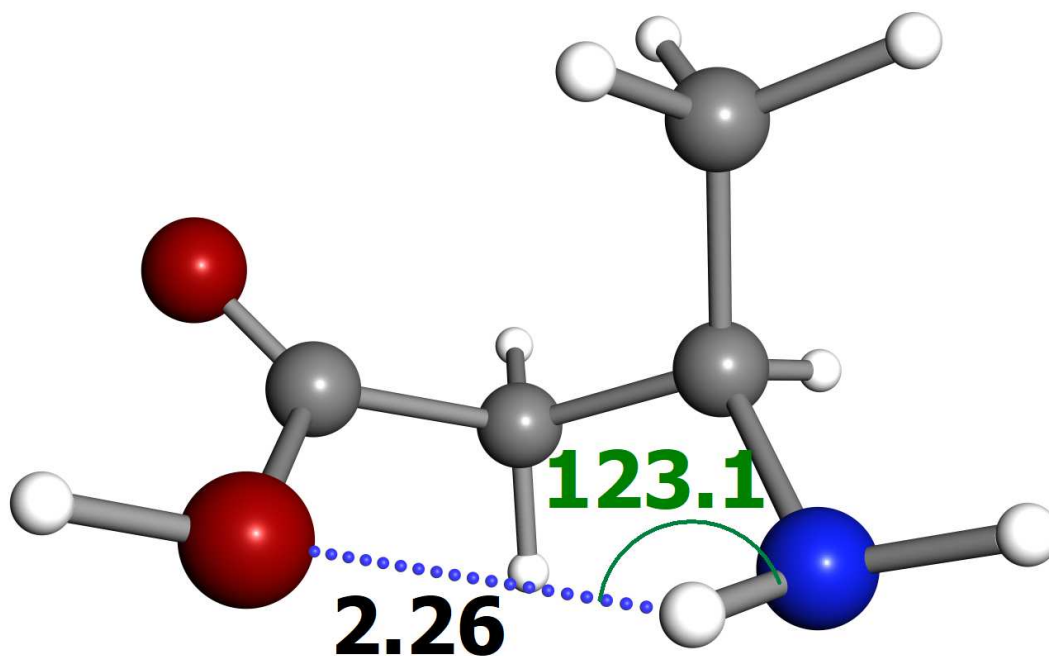

|   |                 |                 |                 |
|---|-----------------|-----------------|-----------------|
| C | 1.260006000000  | -1.209700000000 | -0.798340000000 |
| C | 1.277934000000  | -0.242053000000 | 0.390298000000  |
| N | 1.724621000000  | 1.116011000000  | 0.069178000000  |
| C | -0.093137000000 | -0.189727000000 | 1.090488000000  |
| C | -1.243957000000 | 0.013902000000  | 0.138927000000  |
| O | -1.162623000000 | 1.213889000000  | -0.506236000000 |
| O | -2.143295000000 | -0.769182000000 | -0.069716000000 |
| H | -1.934912000000 | 1.250903000000  | -1.090612000000 |
| H | 2.631410000000  | 1.079235000000  | -0.388486000000 |
| H | 1.076130000000  | 1.549575000000  | -0.582384000000 |
| H | -0.281725000000 | -1.131125000000 | 1.610274000000  |
| H | -0.078257000000 | 0.630366000000  | 1.815170000000  |
| H | 2.264572000000  | -1.306147000000 | -1.222360000000 |
| H | 0.916968000000  | -2.205567000000 | -0.496515000000 |
| H | 0.595533000000  | -0.841845000000 | -1.588085000000 |
| H | 1.980202000000  | -0.629662000000 | 1.138132000000  |

**Fig. S12** N-H...O=C angle (in green) and hydrogen bond distance in Amstrongs (in black) for conformer 12I' of  $\beta$ -aminobutyric acid. The cartesian coordinates are also given.

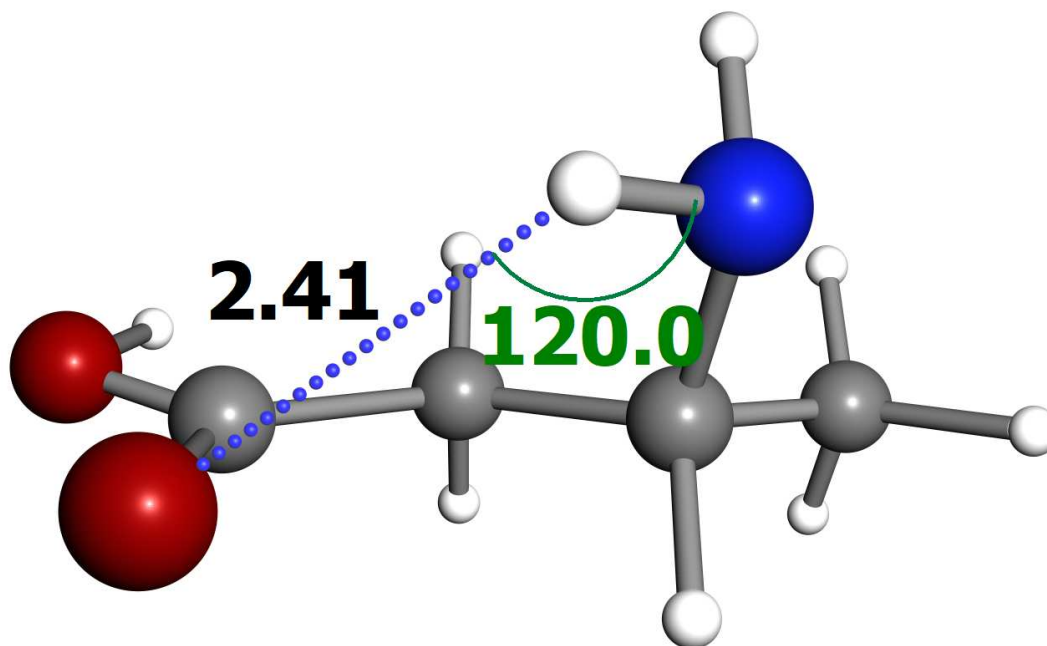

|   |                 |                 |                 |
|---|-----------------|-----------------|-----------------|
| C | -2.433662000000 | -0.768891000000 | -0.206034000000 |
| C | -1.175871000000 | 0.090726000000  | -0.279496000000 |
| N | -1.341931000000 | 1.249225000000  | 0.593145000000  |
| C | 0.062496000000  | -0.762555000000 | 0.033328000000  |
| C | 1.362765000000  | 0.008691000000  | -0.113064000000 |
| O | 2.477480000000  | -0.635109000000 | 0.335255000000  |
| O | 1.456992000000  | 1.106832000000  | -0.602466000000 |
| H | 2.216832000000  | -1.483901000000 | 0.710398000000  |
| H | -1.446567000000 | 0.953863000000  | 1.560624000000  |
| H | -0.531244000000 | 1.857689000000  | 0.532618000000  |
| H | -0.013420000000 | -1.158008000000 | 1.056493000000  |
| H | 0.111926000000  | -1.627213000000 | -0.643840000000 |
| H | -3.308853000000 | -0.168353000000 | -0.463417000000 |
| H | -2.372731000000 | -1.621792000000 | -0.888984000000 |
| H | -2.572101000000 | -1.155751000000 | 0.811011000000  |
| H | -1.060461000000 | 0.477277000000  | -1.297640000000 |

**Table S01.** Experimental and calculated spectroscopic parameters for the twelve calculated conformers of  $\beta$ -aminobutyric acid. Ab initio energies are included for the predicted species. All the calculations were done at MP2 using the 6-311++G(d,p) basis set. A, B, and C represent the rotational constants (in MHz);  $\mu_a$ ,  $\mu_b$ , and  $\mu_c$  are the electric dipole moment components (in D);  $\Delta_J$ ,  $\Delta_{JK}$ , and  $\delta_J$  represent the centrifugal distortion constants (in kHz);  $\chi_{aa}$ ,  $\chi_{bb}$ , and  $\chi_{cc}$  are the diagonal elements of the  $^{14}\text{N}$  nuclear quadrupole coupling tensor (in MHz);  $\Delta E$  is the relative energy (in  $\text{cm}^{-1}$ ) with respect to the global minimum.  $\Delta E_{\text{ZPE}}$  is the relative energy (in  $\text{cm}^{-1}$ ) with respect to the global minimum, taking into account the zero-point energy(ZPE). <sup>a</sup>The values in parenthesis represent the standard error. <sup>b</sup>rms deviation of the fit; <sup>c</sup>Number of quadrupole hyperfine components.

|                         | Experimental                |                |                |                |                | Calculated |        |        |        |        |        |        |        |        |        |        |        |
|-------------------------|-----------------------------|----------------|----------------|----------------|----------------|------------|--------|--------|--------|--------|--------|--------|--------|--------|--------|--------|--------|
|                         | Rotamer 1                   | Rotamer 2      | Rotamer 3      | Rotamer 4      | Rotamer 5      | 1I'        | 2II    | 3II    | 4I'    | 5I'    | 6      | 7I'    | 8III   | 9I'    | 10III  | 11III  | 12I'   |
| <b>A</b>                | 5225.68290(79) <sup>a</sup> | 4217.8797(26)  | 5005.35189(72) | 5153.4375(15)  | 4530.9679(16)  | 5228.8     | 4195.2 | 4993.9 | 5139.6 | 4505.2 | 4807.4 | 4719.2 | 5038.4 | 4011.0 | 3989.3 | 4042.7 | 5100.5 |
| <b>B</b>                | 1588.98441(15)              | 1911.9396(51)  | 1687.32715(32) | 1574.45638(42) | 1698.28098(66) | 1595.4     | 1938.7 | 1695.3 | 1574.7 | 1717.8 | 1559.8 | 1657.6 | 1585.3 | 1974.9 | 1978.0 | 1962.6 | 1575.8 |
| <b>C</b>                | 1337.16163(18)              | 1698.81743(71) | 1332.26858(26) | 1335.74345(43) | 1648.12292(78) | 1346.1     | 1715.8 | 1338.4 | 1347.9 | 1649.6 | 1523.2 | 1409.4 | 1455.2 | 1676.6 | 1681.2 | 1686.4 | 1346.6 |
| $\Delta_J$              | 0.1584(51)                  | 0.430(20)      | 0.1247(50)     | 0.1510(93)     | 0.297(18)      |            |        |        |        |        |        |        |        |        |        |        |        |
| $\Delta_{JK}$           | 1.451(76)                   | -              | 0.205(36)      | -              | 4.41(32)       |            |        |        |        |        |        |        |        |        |        |        |        |
| $\delta_J$              | -                           | -              | 0.0237(45)     | -              | -              |            |        |        |        |        |        |        |        |        |        |        |        |
| $\mu_a$                 |                             |                |                |                |                | -0.3       | 6.2    | 6.7    | -0.9   | -0.1   | 0.1    | 0.0    | 1.5    | 0.9    | 0.1    | 1.2    | -1.0   |
| $\mu_b$                 | ...                         |                |                | ...            | ...            | 0.8        | -0.0   | -0.5   | 1.9    | 1.3    | -1.2   | -1.5   | 1.3    | 1.1    | 1.1    | 0.1    | -4.1   |
| $\mu_c$                 | ...                         |                |                | ...            | ...            | -0.8       | -1.9   | -0.6   | 0.7    | -0.5   | 0.2    | 0.5    | 2.0    | 1.3    | 0.8    | -1.0   | 1.5    |
| $\chi_{aa}$             | 1.6358(31)                  | -1.6909(27)    | -3.047(30)     | -2.703(12)     | 1.4530(17)     | 1.83       | -1.85  | -3.25  | -2.82  | 1.57   | -2.35  | -1.18  | 1.80   | -3.16  | -3.25  | 2.01   | -2.84  |
| $\chi_{bb}$             | 1.6543(20)                  | 1.2239(68)     | 1.2185(21)     | 0.834(18)      | 2.5729(18)     | 1.63       | 1.20   | 1.31   | 0.75   | 2.60   | 2.42   | 2.72   | 0.52   | 2.49   | 2.54   | 0.78   | 0.75   |
| $\chi_{cc}$             | -3.2901(20)                 | 0.4671(68)     | 1.8285(21)     | 1.869(18)      | -4.0259(18)    | -3.40      | 0.65   | 1.94   | 2.07   | -4.17  | -0.07  | -1.54  | -2.33  | 0.67   | 0.71   | -2.78  | 2.09   |
| $\sigma^b$              | 2.1                         | 2.8            | 2.5            | 3.4            | 3.2            |            |        |        |        |        |        |        |        |        |        |        |        |
| $N^c$                   | 48                          | 37             | 49             | 29             | 20             |            |        |        |        |        |        |        |        |        |        |        |        |
| $\Delta E$              |                             |                |                |                |                | 231        | 0      | 139    | 594    | 670    | 754    | 769    | 788    | 784    | 939    | 951    | 2503   |
| $\Delta E_{\text{ZPE}}$ |                             |                |                |                |                | 0          | 12     | 98     | 324    | 467    | 509    | 538    | 566    | 612    | 755    | 774    | 2171   |
| $\Delta G_{\text{ZPE}}$ |                             |                |                |                |                | 0          | 248    | 278    | 289    | 472    | 373    | 319    | 521    | 606    | 762    | 815    | 2163   |

**Table S02.** Experimental and calculated spectroscopic parameters for the detected conformers of  $\beta$ -aminobutyric acid. Ab initio energies are included for the predicted species. All the calculations were done at MP2 using the 6-311++G(d,p) basis set.  $A$ ,  $B$ , and  $C$  represent the rotational constants (in MHz);  $\mu_a$ ,  $\mu_b$ , and  $\mu_c$  are the electric dipole moment components (in D);  $\Delta_J$ ,  $\Delta_{JK}$ , and  $\delta_J$  represent the centrifugal distortion constants (in kHz);  $\chi_{aa}$ ,  $\chi_{bb}$ , and  $\chi_{cc}$ , are the diagonal elements of the  $^{14}\text{N}$  nuclear quadrupole coupling tensor (in MHz);  $\Delta E$  is the relative energy (in  $\text{cm}^{-1}$ ) with respect to the global minimum.  $\Delta E_{\text{ZPE}}$  is the relative energy (in  $\text{cm}^{-1}$ ) with respect to the global minimum, taking into account the zero-point energy (ZPE). <sup>a</sup>The values in parenthesis represent the standard error. <sup>b</sup>rms deviation of the fit; <sup>c</sup>Number of quadrupole hyperfine components.

|                         | Experimental                |                |                |                |                | Calculated |        |        |        |               |
|-------------------------|-----------------------------|----------------|----------------|----------------|----------------|------------|--------|--------|--------|---------------|
|                         | Rotamer 1                   | Rotamer 2      | Rotamer 3      | Rotamer 4      | Rotamer 5      | 1I'        | 2II    | 3II    | 4I'    | 5I'           |
| <b>A</b>                | 5225.68290(79) <sup>a</sup> | 4217.8797(26)  | 5005.35189(72) | 5153.4375(15)  | 4530.9679(16)  | 5228.8     | 4195.2 | 4993.9 | 5139.6 | <b>4505.2</b> |
| <b>B</b>                | 1588.98441(15)              | 1911.9396(51)  | 1687.32715(32) | 1574.45638(42) | 1698.28098(66) | 1595.4     | 1938.7 | 1695.3 | 1574.7 | <b>1717.8</b> |
| <b>C</b>                | 1337.16163(18)              | 1698.81743(71) | 1332.26858(26) | 1335.74345(43) | 1648.12292(78) | 1346.1     | 1715.8 | 1338.4 | 1347.9 | <b>1649.6</b> |
| $\Delta_J$              | 0.1584(51)                  | 0.430(20)      | 0.1247(50)     | 0.1510(93)     | 0.297(18)      |            |        |        |        |               |
| $\Delta_{JK}$           | 1.451(76)                   | -              | 0.205(36)      | -              | 4.41(32)       |            |        |        |        |               |
| $\delta_J$              | -                           | -              | 0.0237(45)     | -              | -              |            |        |        |        |               |
| $ \mu_a $               |                             |                |                |                |                | 0.3        | 6.2    | 6.7    | 0.9    | <b>0.1</b>    |
| $ \mu_b $               | ...                         |                |                | ...            | ...            | 0.8        | 0.0    | 0.5    | 1.9    | <b>1.3</b>    |
| $ \mu_c $               | ...                         |                |                | ...            | ...            | 0.8        | 1.9    | 0.6    | 0.7    | <b>0.5</b>    |
| $\chi_{aa}$             | 1.6358(31)                  | -1.6909(27)    | -3.047(30)     | -2.703(12)     | 1.4530(17)     | 1.83       | -1.85  | -3.25  | -2.82  | <b>1.57</b>   |
| $\chi_{bb}$             | 1.6543(20)                  | 1.2239(68)     | 1.2185(21)     | 0.834(18)      | 2.5729(18)     | 1.63       | 1.20   | 1.31   | 0.75   | <b>2.60</b>   |
| $\chi_{cc}$             | -3.2901(20)                 | 0.4671(68)     | 1.8285(21)     | 1.869(18)      | -4.0259(18)    | -3.40      | 0.65   | 1.94   | 2.07   | <b>-4.17</b>  |
| $\sigma^b$              | 2.1                         | 2.8            | 2.5            | 3.4            | 3.2            |            |        |        |        |               |
| $N^c$                   | 48                          | 37             | 49             | 29             | 20             |            |        |        |        |               |
| $\Delta E$              |                             |                |                |                |                | 231        | 0      | 139    | 594    | <b>670</b>    |
| $\Delta E_{\text{ZPE}}$ |                             |                |                |                |                | 0          | 12     | 98     | 324    | <b>467</b>    |
| $\Delta G_{\text{ZPE}}$ |                             |                |                |                |                | 0          | 248    | 278    | 289    | <b>472</b>    |

**Table S03.** Measured frequencies and residuals (in MHz) for the nuclear quadrupole coupling hyperfine components of conformer 1I' of  $\beta$ -aminobutyric acid.

| $J'$ | $K'_a$ | $K'_c$ | $J''$ | $K''_a$ | $K''_c$ | $F'$ | $F''$ | $V_{\text{obs}}$ | $V_{\text{obs}} - V_{\text{cal}}$ |
|------|--------|--------|-------|---------|---------|------|-------|------------------|-----------------------------------|
| 3    | 1      | 3      | 2     | 1       | 2       | 4    | 3     | 8392.897         | 0.001                             |
| 3    | 1      | 3      | 2     | 1       | 2       | 2    | 1     | 8393.042         | -0.004                            |
| 3    | 1      | 3      | 2     | 1       | 2       | 3    | 2     | 8393.088         | -0.000                            |
| 3    | 0      | 3      | 2     | 0       | 2       | 4    | 3     | 8728.070         | -0.000                            |
| 3    | 0      | 3      | 2     | 0       | 2       | 2    | 1     | 8728.151         | -0.002                            |
| 3    | 0      | 3      | 2     | 0       | 2       | 3    | 2     | 8728.174         | 0.002                             |
| 3    | 1      | 2      | 2     | 1       | 1       | 4    | 3     | 9148.027         | 0.001                             |
| 3    | 1      | 2      | 2     | 1       | 1       | 3    | 2     | 9148.160         | -0.001                            |
| 3    | 1      | 2      | 2     | 1       | 1       | 2    | 1     | 9147.870         | -0.001                            |
| 4    | 1      | 4      | 3     | 1       | 3       | 5    | 4     | 11176.726        | 0.001                             |
| 4    | 1      | 4      | 3     | 1       | 3       | 3    | 2     | 11176.812        | -0.001                            |
| 4    | 1      | 4      | 3     | 1       | 3       | 4    | 3     | 11176.834        | 0.001                             |
| 4    | 0      | 4      | 3     | 0       | 3       | 5    | 4     | 11580.073        | 0.001                             |
| 4    | 0      | 4      | 3     | 0       | 3       | 3    | 2     | 11580.103        | -0.000                            |
| 4    | 0      | 4      | 3     | 0       | 3       | 4    | 3     | 11580.193        | -0.001                            |
| 4    | 1      | 3      | 3     | 1       | 2       | 3    | 2     | 12181.622        | 0.001                             |
| 4    | 1      | 3      | 3     | 1       | 2       | 5    | 4     | 12181.677        | 0.000                             |
| 4    | 1      | 3      | 3     | 1       | 2       | 4    | 3     | 12181.754        | 0.002                             |
| 5    | 1      | 5      | 4     | 1       | 4       | 6    | 5     | 13949.795        | 0.000                             |
| 5    | 1      | 5      | 4     | 1       | 4       | 4    | 3     | 13949.851        | -0.001                            |
| 5    | 1      | 5      | 4     | 1       | 4       | 5    | 4     | 13949.874        | -0.000                            |
| 1    | 1      | 1      | 0     | 0       | 0       | 0    | 1     | 6562.011         | -0.003                            |
| 1    | 1      | 1      | 0     | 0       | 0       | 2    | 1     | 6562.757         | -0.001                            |
| 1    | 1      | 1      | 0     | 0       | 0       | 1    | 1     | 6563.253         | -0.002                            |
| 2    | 1      | 2      | 1     | 0       | 1       | 3    | 2     | 9237.001         | 0.000                             |
| 2    | 1      | 2      | 1     | 0       | 1       | 1    | 0     | 9237.150         | 0.000                             |
| 2    | 1      | 2      | 1     | 0       | 1       | 2    | 1     | 9237.565         | -0.003                            |
| 3    | 1      | 3      | 2     | 0       | 2       | 2    | 1     | 11790.170        | 0.000                             |
| 3    | 1      | 3      | 2     | 0       | 2       | 4    | 3     | 11790.288        | 0.002                             |
| 3    | 1      | 3      | 2     | 0       | 2       | 3    | 2     | 11790.956        | -0.001                            |
| 4    | 1      | 4      | 3     | 0       | 3       | 3    | 2     | 14238.831        | 0.002                             |
| 4    | 1      | 4      | 3     | 0       | 3       | 5    | 4     | 14238.941        | 0.001                             |
| 4    | 1      | 4      | 3     | 0       | 3       | 4    | 3     | 14239.619        | 0.000                             |
| 5    | 1      | 5      | 4     | 0       | 4       | 4    | 3     | 16608.572        | -0.005                            |
| 5    | 1      | 5      | 4     | 0       | 4       | 6    | 5     | 16608.667        | 0.004                             |
| 5    | 1      | 5      | 4     | 0       | 4       | 5    | 4     | 16609.300        | 0.001                             |
| 1    | 1      | 0      | 0     | 0       | 0       | 1    | 1     | 6813.847         | 0.006                             |
| 1    | 1      | 0      | 0     | 0       | 0       | 2    | 1     | 6814.824         | -0.004                            |
| 1    | 1      | 0      | 0     | 0       | 0       | 0    | 1     | 6816.313         | 0.004                             |
| 2    | 1      | 1      | 1     | 0       | 1       | 2    | 1     | 9991.804         | 0.004                             |
| 2    | 1      | 1      | 1     | 0       | 1       | 3    | 2     | 9992.820         | -0.002                            |
| 2    | 1      | 1      | 1     | 0       | 1       | 1    | 0     | 9993.855         | 0.001                             |
| 3    | 1      | 2      | 2     | 0       | 2       | 3    | 2     | 13300.263        | 0.000                             |
| 3    | 1      | 2      | 2     | 0       | 2       | 4    | 3     | 13301.238        | -0.000                            |
| 3    | 1      | 2      | 2     | 0       | 2       | 2    | 1     | 13301.697        | -0.001                            |



|   |   |   |   |   |   |   |   |           |        |
|---|---|---|---|---|---|---|---|-----------|--------|
| 4 | 1 | 3 | 3 | 0 | 3 | 4 | 3 | 16753.841 | -0.002 |
| 4 | 1 | 3 | 3 | 0 | 3 | 5 | 4 | 16754.842 | -0.003 |
| 4 | 1 | 3 | 3 | 0 | 3 | 3 | 2 | 16755.168 | 0.002  |

---

**Table S04.** Measured frequencies and residuals (in MHz) for the nuclear quadrupole coupling hyperfine components of conformer 2II of  $\beta$ -aminobutyric acid.

| $J'$ | $K'_a$ | $K'_c$ | $J''$ | $K''_a$ | $K''_c$ | $F'$ | $F''$ | $V_{\text{obs}}$ | $V_{\text{obs}} - V_{\text{cal}}$ |
|------|--------|--------|-------|---------|---------|------|-------|------------------|-----------------------------------|
| 2    | 1      | 2      | 1     | 1       | 1       | 2    | 1     | 7007.954         | -0.001                            |
| 2    | 1      | 2      | 1     | 1       | 1       | 3    | 2     | 7008.471         | -0.002                            |
| 2    | 1      | 2      | 1     | 1       | 1       | 1    | 0     | 7009.107         | -0.000                            |
| 2    | 0      | 2      | 1     | 0       | 1       | 3    | 2     | 7207.435         | 0.002                             |
| 2    | 0      | 2      | 1     | 0       | 1       | 1    | 0     | 7206.969         | -0.000                            |
| 2    | 0      | 2      | 1     | 0       | 1       | 2    | 1     | 7207.405         | -0.005                            |
| 2    | 0      | 2      | 1     | 0       | 1       | 2    | 2     | 7206.906         | 0.003                             |
| 2    | 0      | 2      | 1     | 0       | 1       | 1    | 1     | 7208.242         | 0.005                             |
| 2    | 1      | 1      | 1     | 1       | 0       | 2    | 1     | 7434.205         | 0.005                             |
| 2    | 1      | 1      | 1     | 1       | 0       | 3    | 2     | 7434.737         | 0.004                             |
| 2    | 1      | 1      | 1     | 1       | 0       | 1    | 0     | 7435.166         | 0.004                             |
| 3    | 1      | 3      | 2     | 1       | 2       | 3    | 2     | 10503.899        | -0.001                            |
| 3    | 1      | 3      | 2     | 1       | 2       | 4    | 3     | 10504.041        | -0.001                            |
| 3    | 1      | 3      | 2     | 1       | 2       | 2    | 1     | 10504.062        | 0.001                             |
| 3    | 0      | 3      | 2     | 0       | 2       | 2    | 1     | 10776.138        | -0.001                            |
| 3    | 0      | 3      | 2     | 0       | 2       | 3    | 2     | 10776.246        | -0.001                            |
| 3    | 0      | 3      | 2     | 0       | 2       | 4    | 3     | 10776.246        | -0.000                            |
| 3    | 2      | 2      | 2     | 2       | 1       | 3    | 2     | 10831.800        | -0.002                            |
| 3    | 2      | 2      | 2     | 2       | 1       | 4    | 3     | 10832.345        | 0.000                             |
| 3    | 2      | 2      | 2     | 2       | 1       | 2    | 1     | 10832.642        | -0.005                            |
| 3    | 2      | 1      | 2     | 2       | 0       | 3    | 2     | 10887.778        | 0.003                             |
| 3    | 2      | 1      | 2     | 2       | 0       | 4    | 3     | 10888.342        | 0.002                             |
| 3    | 2      | 1      | 2     | 2       | 0       | 2    | 1     | 10888.644        | -0.006                            |
| 3    | 1      | 2      | 2     | 1       | 1       | 3    | 2     | 11142.684        | 0.001                             |
| 3    | 1      | 2      | 2     | 1       | 1       | 2    | 1     | 11142.802        | -0.003                            |
| 3    | 1      | 2      | 2     | 1       | 1       | 4    | 3     | 11142.835        | -0.001                            |
| 4    | 1      | 4      | 3     | 1       | 3       | 4    | 3     | 13990.112        | 0.004                             |
| 4    | 1      | 4      | 3     | 1       | 3       | 3    | 2     | 13990.153        | -0.001                            |
| 4    | 1      | 4      | 3     | 1       | 3       | 5    | 4     | 13990.168        | 0.002                             |
| 4    | 0      | 4      | 3     | 0       | 3       | 3    | 2     | 14305.446        | 0.002                             |
| 4    | 0      | 4      | 3     | 0       | 3       | 5    | 4     | 14305.494        | -0.002                            |
| 4    | 0      | 4      | 3     | 0       | 3       | 4    | 3     | 14305.507        | -0.001                            |
| 1    | 1      | 0      | 0     | 0       | 0       | 2    | 1     | 6129.793         | -0.001                            |
| 1    | 1      | 0      | 0     | 0       | 0       | 1    | 1     | 6129.930         | -0.004                            |
| 2    | 1      | 1      | 1     | 0       | 1       | 3    | 2     | 9953.691         | 0.004                             |
| 2    | 1      | 1      | 1     | 0       | 1       | 2    | 1     | 9953.802         | 0.001                             |
| 3    | 1      | 2      | 2     | 0       | 2       | 4    | 3     | 13889.087        | -0.000                            |

**Table S05.** Measured frequencies and residuals (in MHz) for the nuclear quadrupole coupling hyperfine components of conformer 3II of  $\beta$ -aminobutyric acid.

| $J'$ | $K'_a$ | $K'_c$ | $J''$ | $K''_a$ | $K''_c$ | $F'$ | $F''$ | $V_{\text{obs}}$ | $V_{\text{obs}} - V_{\text{cal}}$ |
|------|--------|--------|-------|---------|---------|------|-------|------------------|-----------------------------------|
| 2    | 0      | 2      | 1     | 0       | 1       | 3    | 2     | 6012.258         | 0.000                             |
| 2    | 0      | 2      | 1     | 0       | 1       | 2    | 1     | 6012.181         | -0.005                            |
| 2    | 0      | 2      | 1     | 0       | 1       | 1    | 0     | 6011.435         | 0.001                             |
| 2    | 0      | 2      | 1     | 0       | 1       | 2    | 2     | 6011.271         | -0.001                            |
| 2    | 1      | 1      | 1     | 1       | 0       | 3    | 2     | 6394.423         | -0.000                            |
| 2    | 1      | 1      | 1     | 1       | 0       | 2    | 1     | 6393.485         | 0.002                             |
| 2    | 1      | 1      | 1     | 1       | 0       | 1    | 0     | 6395.465         | 0.001                             |
| 3    | 1      | 3      | 2     | 1       | 2       | 4    | 3     | 8509.996         | -0.001                            |
| 3    | 1      | 3      | 2     | 1       | 2       | 3    | 2     | 8509.718         | -0.001                            |
| 3    | 1      | 3      | 2     | 1       | 2       | 2    | 1     | 8509.977         | 0.004                             |
| 3    | 0      | 3      | 2     | 0       | 2       | 4    | 3     | 8951.849         | -0.001                            |
| 3    | 0      | 3      | 2     | 0       | 2       | 3    | 2     | 8951.808         | 0.004                             |
| 3    | 0      | 3      | 2     | 0       | 2       | 2    | 1     | 8951.662         | -0.001                            |
| 3    | 2      | 2      | 2     | 2       | 1       | 4    | 3     | 9058.984         | -0.002                            |
| 3    | 2      | 2      | 2     | 2       | 1       | 3    | 2     | 9058.008         | 0.002                             |
| 3    | 2      | 1      | 2     | 2       | 0       | 4    | 3     | 9165.944         | -0.003                            |
| 3    | 2      | 1      | 2     | 2       | 0       | 3    | 2     | 9164.976         | -0.000                            |
| 3    | 2      | 1      | 2     | 2       | 0       | 2    | 1     | 9166.490         | 0.001                             |
| 3    | 1      | 2      | 2     | 1       | 1       | 4    | 3     | 9573.872         | -0.001                            |
| 3    | 1      | 2      | 2     | 1       | 1       | 3    | 2     | 9573.602         | -0.001                            |
| 3    | 1      | 2      | 2     | 1       | 1       | 2    | 1     | 9573.887         | -0.000                            |
| 4    | 1      | 4      | 3     | 1       | 3       | 5    | 4     | 11317.948        | -0.000                            |
| 4    | 1      | 4      | 3     | 1       | 3       | 4    | 3     | 11317.820        | -0.001                            |
| 4    | 1      | 4      | 3     | 1       | 3       | 3    | 2     | 11317.900        | 0.000                             |
| 4    | 0      | 4      | 3     | 0       | 3       | 5    | 4     | 11817.327        | -0.001                            |
| 4    | 0      | 4      | 3     | 0       | 3       | 4    | 3     | 11817.292        | 0.000                             |
| 4    | 0      | 4      | 3     | 0       | 3       | 3    | 2     | 11817.244        | 0.003                             |
| 4    | 2      | 3      | 3     | 2       | 2       | 4    | 3     | 12057.011        | 0.000                             |
| 4    | 2      | 3      | 3     | 2       | 2       | 5    | 4     | 12057.430        | 0.001                             |
| 4    | 2      | 3      | 3     | 2       | 2       | 3    | 2     | 12057.536        | -0.000                            |
| 4    | 1      | 3      | 3     | 1       | 2       | 4    | 3     | 12730.348        | -0.000                            |
| 4    | 1      | 3      | 3     | 1       | 2       | 3    | 2     | 12730.449        | 0.000                             |
| 4    | 1      | 3      | 3     | 1       | 2       | 5    | 4     | 12730.478        | 0.000                             |
| 5    | 1      | 5      | 4     | 1       | 4       | 5    | 4     | 14104.851        | -0.001                            |
| 5    | 1      | 5      | 4     | 1       | 4       | 4    | 3     | 14104.886        | 0.001                             |
| 5    | 1      | 5      | 4     | 1       | 4       | 6    | 5     | 14104.925        | 0.002                             |
| 5    | 0      | 5      | 4     | 0       | 4       | 6    | 5     | 14599.517        | -0.000                            |
| 5    | 0      | 5      | 4     | 0       | 4       | 5    | 4     | 14599.486        | -0.001                            |
| 5    | 0      | 5      | 4     | 0       | 4       | 4    | 3     | 14599.465        | -0.001                            |
| 1    | 1      | 1      | 0     | 0       | 0       | 2    | 1     | 6337.558         | -0.001                            |
| 1    | 1      | 1      | 0     | 0       | 0       | 1    | 1     | 6337.927         | 0.002                             |
| 2    | 1      | 2      | 1     | 0       | 1       | 3    | 2     | 9002.129         | -0.002                            |
| 2    | 1      | 2      | 1     | 0       | 1       | 2    | 1     | 9002.460         | 0.001                             |
| 1    | 1      | 0      | 0     | 0       | 0       | 2    | 1     | 6692.590         | 0.003                             |
| 1    | 1      | 0      | 0     | 0       | 0       | 1    | 1     | 6693.136         | 0.001                             |

|   |   |   |   |   |   |   |   |           |        |
|---|---|---|---|---|---|---|---|-----------|--------|
| 1 | 1 | 0 | 0 | 0 | 0 | 0 | 1 | 6691.760  | -0.005 |
| 2 | 1 | 1 | 1 | 0 | 1 | 3 | 2 | 10067.266 | 0.004  |
| 2 | 1 | 1 | 1 | 0 | 1 | 2 | 1 | 10067.779 | -0.006 |
| 2 | 1 | 1 | 1 | 0 | 1 | 1 | 0 | 10066.109 | 0.001  |

---

**Table S06.** Measured frequencies and residuals (in MHz) for the nuclear quadrupole coupling hyperfine components of conformer 4I of  $\beta$ -aminobutyric acid.

| $J'$ | $K'_a$ | $K'_c$ | $J''$ | $K''_a$ | $K''_c$ | $F'$ | $F''$ | $\nu_{\text{obs}}$ | $\nu_{\text{obs}} - \nu_{\text{cal}}$ |
|------|--------|--------|-------|---------|---------|------|-------|--------------------|---------------------------------------|
| 2    | 0      | 2      | 1     | 0       | 1       | 3    | 2     | 5808.907           | -0.000                                |
| 2    | 1      | 1      | 1     | 1       | 0       | 3    | 2     | 6059.259           | -0.001                                |
| 3    | 1      | 3      | 2     | 1       | 2       | 3    | 2     | 8365.296           | 0.004                                 |
| 3    | 1      | 3      | 2     | 1       | 2       | 2    | 1     | 8365.511           | 0.004                                 |
| 3    | 1      | 3      | 2     | 1       | 2       | 4    | 3     | 8365.538           | -0.004                                |
| 3    | 0      | 3      | 2     | 0       | 2       | 2    | 1     | 8684.453           | 0.007                                 |
| 3    | 0      | 3      | 2     | 0       | 2       | 3    | 2     | 8684.569           | 0.005                                 |
| 3    | 0      | 3      | 2     | 0       | 2       | 4    | 3     | 8684.612           | 0.002                                 |
| 3    | 1      | 2      | 2     | 1       | 1       | 3    | 2     | 9081.079           | -0.002                                |
| 3    | 1      | 2      | 2     | 1       | 1       | 4    | 3     | 9081.312           | -0.008                                |
| 3    | 1      | 2      | 2     | 1       | 1       | 2    | 1     | 9081.346           | -0.002                                |
| 4    | 1      | 4      | 3     | 1       | 3       | 4    | 3     | 11141.180          | -0.003                                |
| 4    | 1      | 4      | 3     | 1       | 3       | 3    | 2     | 11141.250          | 0.000                                 |
| 4    | 1      | 4      | 3     | 1       | 3       | 5    | 4     | 11141.300          | 0.000                                 |
| 4    | 0      | 4      | 3     | 0       | 3       | 4    | 3     | 11526.871          | -0.000                                |
| 4    | 0      | 4      | 3     | 0       | 3       | 5    | 4     | 11526.913          | 0.001                                 |
| 4    | 0      | 4      | 3     | 0       | 3       | 3    | 2     | 11526.840          | 0.004                                 |
| 5    | 0      | 5      | 4     | 0       | 4       | 5    | 4     | 14327.718          | 0.001                                 |
| 5    | 0      | 5      | 4     | 0       | 4       | 6    | 5     | 14327.753          | -0.002                                |
| 1    | 1      | 1      | 0     | 0       | 0       | 0    | 1     | 6488.769           | 0.005                                 |
| 1    | 1      | 1      | 0     | 0       | 0       | 2    | 1     | 6489.142           | 0.003                                 |
| 1    | 1      | 1      | 0     | 0       | 0       | 1    | 1     | 6489.388           | -0.001                                |
| 2    | 1      | 2      | 1     | 0       | 1       | 3    | 2     | 9160.662           | 0.001                                 |
| 2    | 1      | 2      | 1     | 0       | 1       | 2    | 1     | 9160.872           | 0.001                                 |
| 2    | 1      | 2      | 1     | 0       | 1       | 1    | 0     | 9159.774           | -0.005                                |
| 3    | 1      | 3      | 2     | 0       | 2       | 4    | 3     | 11717.292          | -0.004                                |
| 3    | 1      | 3      | 2     | 0       | 2       | 2    | 1     | 11717.102          | -0.004                                |
| 3    | 1      | 3      | 2     | 0       | 2       | 3    | 2     | 11717.324          | 0.000                                 |
| 1    | 1      | 0      | 0     | 0       | 0       | 2    | 1     | 6727.803           | 0.003                                 |

**Table S07.** Measured frequencies and residuals (in MHz) for the nuclear quadrupole coupling hyperfine components of conformer 5I of  $\beta$ -aminobutyric acid.

| $J'$ | $K'_a$ | $K'_c$ | $J''$ | $K''_a$ | $K''_c$ | $F'$ | $F''$ | $\nu_{\text{obs}}$ | $\nu_{\text{obs}} - \nu_{\text{cal}}$ |
|------|--------|--------|-------|---------|---------|------|-------|--------------------|---------------------------------------|
| 1    | 1      | 1      | 0     | 0       | 0       | 0    | 1     | 6177.791           | -0.004                                |
| 1    | 1      | 1      | 0     | 0       | 0       | 2    | 1     | 6178.950           | -0.002                                |
| 1    | 1      | 1      | 0     | 0       | 0       | 1    | 1     | 6179.721           | -0.003                                |
| 3    | 0      | 3      | 2     | 1       | 2       | 4    | 3     | 7253.533           | 0.001                                 |
| 3    | 0      | 3      | 2     | 1       | 2       | 3    | 2     | 7252.764           | -0.006                                |
| 3    | 0      | 3      | 2     | 1       | 2       | 2    | 1     | 7254.065           | 0.001                                 |
| 2    | 1      | 2      | 1     | 0       | 1       | 1    | 0     | 9475.025           | 0.005                                 |
| 2    | 1      | 2      | 1     | 0       | 1       | 3    | 2     | 9475.087           | 0.001                                 |
| 2    | 1      | 2      | 1     | 0       | 1       | 2    | 1     | 9475.949           | 0.005                                 |
| 4    | 0      | 4      | 3     | 1       | 3       | 4    | 3     | 10668.145          | 0.004                                 |
| 4    | 0      | 4      | 3     | 1       | 3       | 5    | 4     | 10669.028          | 0.002                                 |
| 4    | 0      | 4      | 3     | 1       | 3       | 3    | 2     | 10669.386          | -0.004                                |
| 3    | 1      | 3      | 2     | 0       | 2       | 2    | 1     | 12746.162          | -0.003                                |
| 3    | 1      | 3      | 2     | 0       | 2       | 4    | 3     | 12746.411          | 0.002                                 |
| 3    | 1      | 3      | 2     | 0       | 2       | 3    | 2     | 12747.391          | -0.001                                |
| 4    | 1      | 4      | 3     | 0       | 3       | 4    | 3     | 15994.754          | -0.005                                |
| 4    | 1      | 4      | 3     | 0       | 3       | 5    | 4     | 15993.731          | 0.001                                 |
| 4    | 1      | 4      | 3     | 0       | 3       | 3    | 2     | 15993.518          | 0.003                                 |
| 1    | 1      | 0      | 0     | 0       | 0       | 2    | 1     | 6229.440           | -0.000                                |
| 2    | 1      | 1      | 1     | 0       | 1       | 3    | 2     | 9626.031           | 0.000                                 |

**Fig. S13** Calculated relaxed potential energy surface varying the C-C-C=O dihedral angle of structures 1I' and 8III. As can be seen, structure 8III experiences conformer interconversion into structure 1I' and it is "missing" during the expansion. The calculation was done using the MP2 theory and Pople's 6-311++G (d,p) basis set.

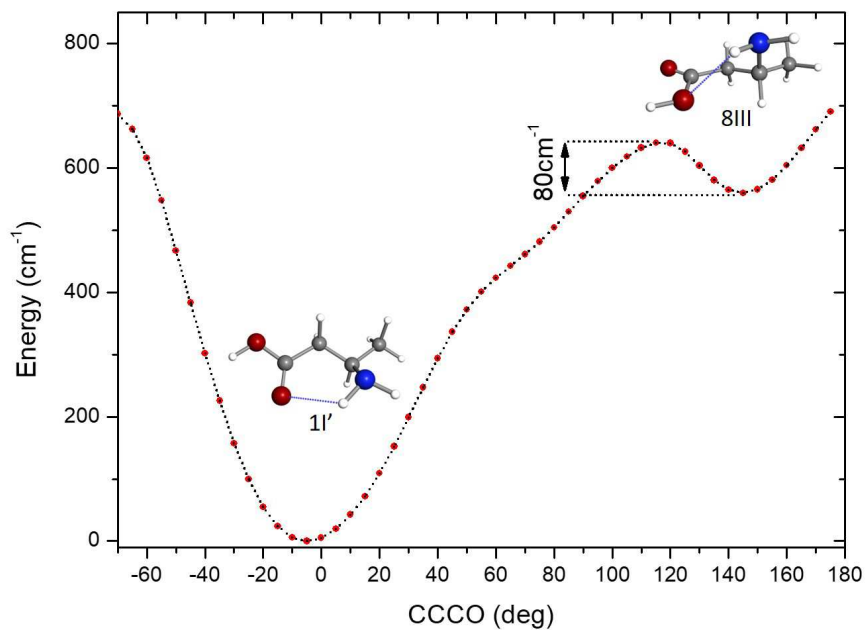

**Fig. S14** Calculated relaxed potential energy surface varying the C-C-C=O dihedral angle of structures 5I' and 11III. The calculation was done using the MP2 theory and Pople's 6-311++G (d,p) basis set. The barrier decreases to 390 cm<sup>-1</sup> when the B3LYP method is used (see Figure S05), indicating that structure 11III could experience conformer interconversion into structure 5I'.

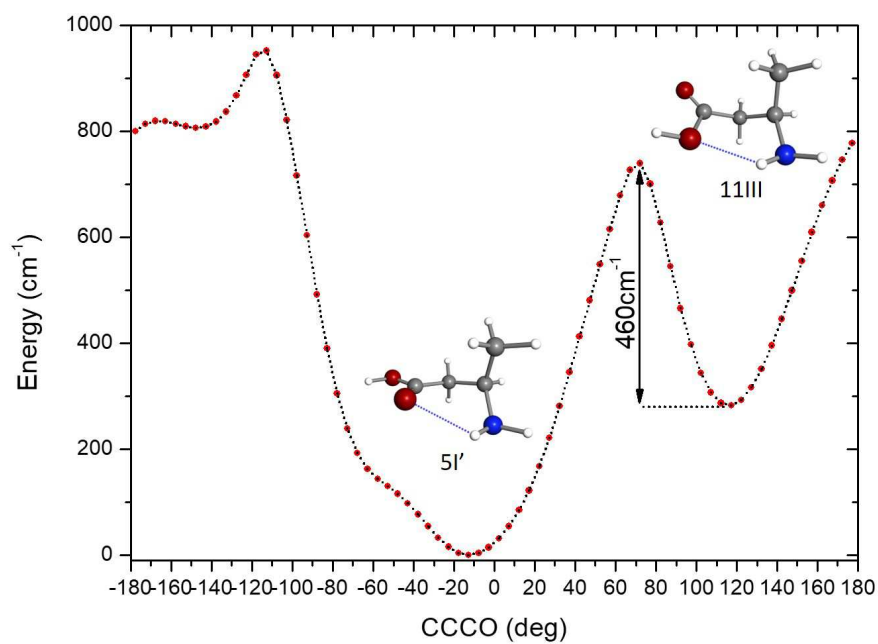



**Fig. S15** Calculated relaxed potential energy surface varying the C-C-C=O dihedral angle of structures 9I' and 10III. As can be seen, structure 10III experiences conformer interconversion into structure 9I' and it is "missing" during the expansion. The calculation was done using the MP2 theory and Pople's 6-311++G (d,p) basis set.

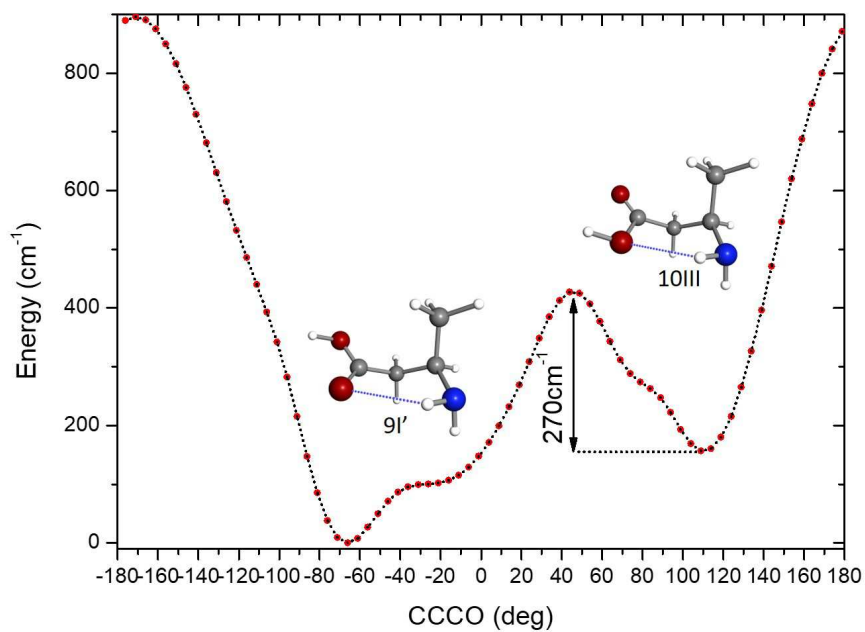

**Fig. S16** Calculated relaxed potential energy surface varying the C-C-C=O dihedral angle of structures 1I' and 8III. As can be seen, structure 8III experiences conformer interconversion into structure 1I' and it is "missing" during the expansion. The calculation was done using the B3LYP density functional with the Grimme D3 dispersion interactions and Pople's 6-311++G (d,p) basis set.

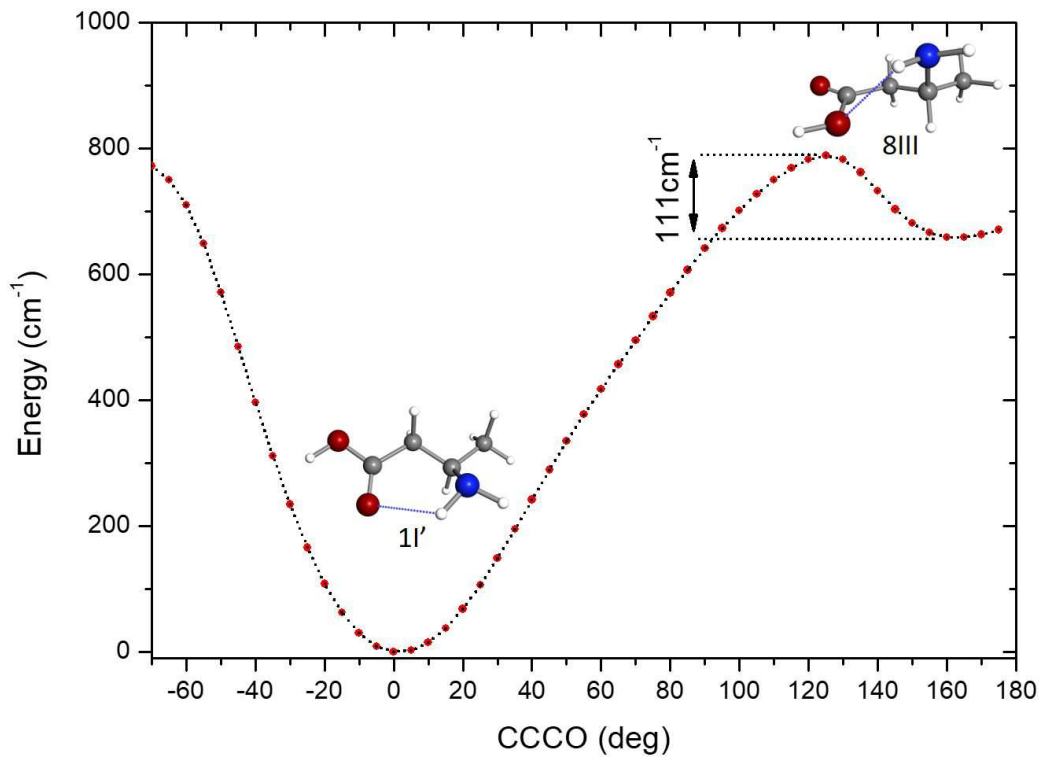

**Fig. S17** Calculated relaxed potential energy surface varying the C-C-C=O dihedral angle of structures 5I' and 11III. As can be seen, structure 11III experiences conformer interconversion into structure 5I' and it is "missing" during the expansion. The calculation was done using the B3LYP density functional with the Grimme D3 dispersion interactions and Pople's 6-311++G (d,p) basis set.

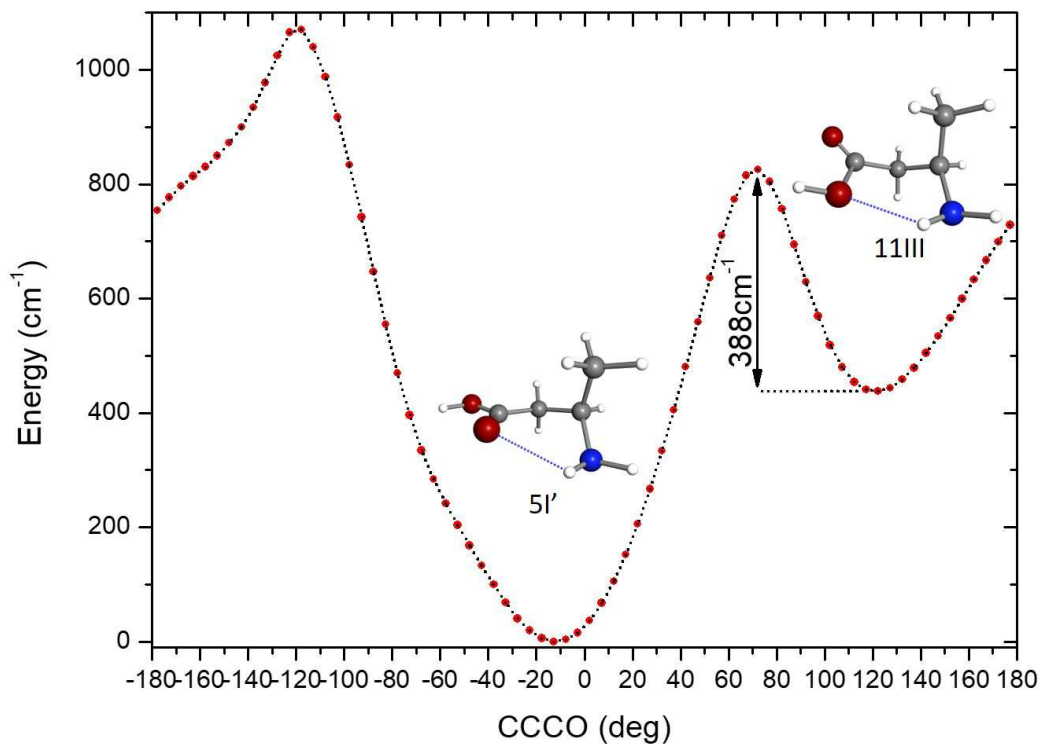

**Fig. S18** Calculated relaxed potential energy surface varying the C-C-C=O dihedral angle of structures 9I' and 10III. As can be seen, structure 10III experiences conformer interconversion into structure 9I' and it is "missing" during the expansion. The calculation was done using the B3LYP density functional with the Grimme D3 dispersion interactions and Pople's 6-311++G (d,p) basis set.

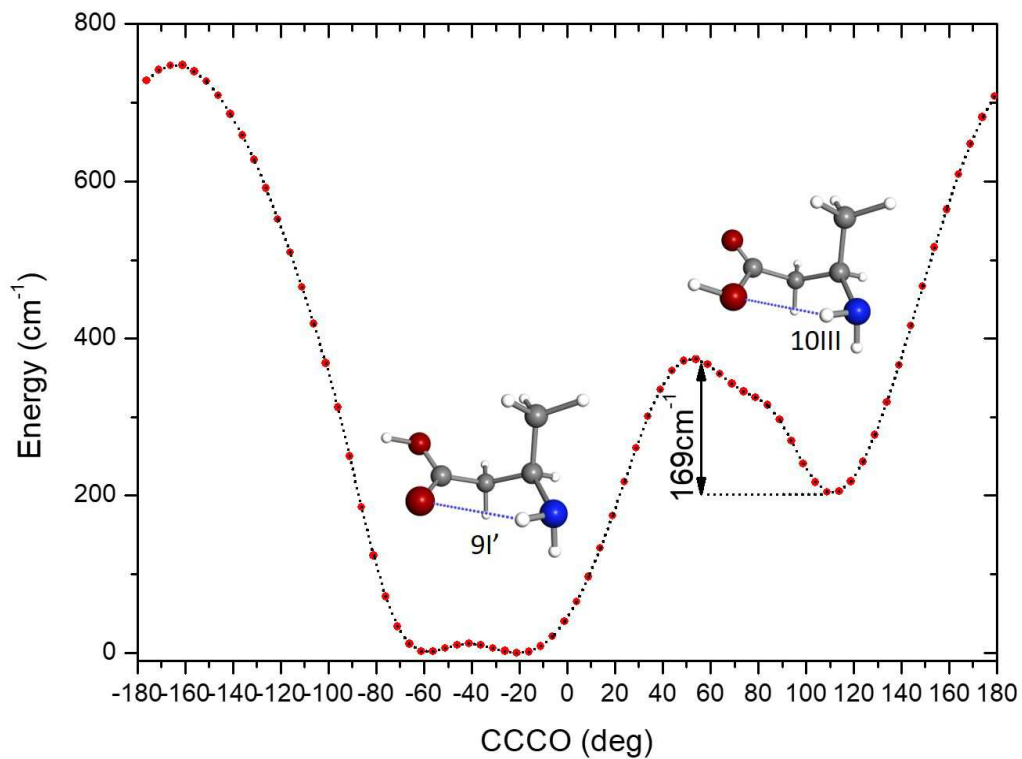

Supplement: c8cp01734d1.pdf [file c8cp01734d1.pdf]
